# Supplementary material for: A Retrospective Chart Review of Factors Impacting Psychotropic Prescribing Patterns and Polypharmacy Rates in Youth with Autism Spectrum Disorder during the COVID-19 Pandemic
Source: MDPI journal article supplement (doi:10.3390/jcm11164855), 2022-08-18
Supplement: s1 [file s1]

# Supplementary Materials

**Table S1.** Indication Based Medication Classes and Examples.

| Indication Based Medication Classes | Examples of Medications Utilized in Study                                                                                          |
|-------------------------------------|------------------------------------------------------------------------------------------------------------------------------------|
| ADHD Medications                    | amphetamine-dextroamphetamine salt preparations, methylphenidate preparations, clonidine, guanfacine, atomoxetine                  |
| Antidepressants                     | sertraline, escitalopram, fluoxetine, fluvoxamine, duloxetine, venlafaxine, clomipramine, bupropion, mirtazapine, and vortioxetine |
| Mood Stabilizers                    | lithium, lamotrigine, carbamazepine, oxcarbazepine, and valproic acid                                                              |
| Anxiolytics                         | alprazolam, clonazepam, diazepam, lorazepam, buspirone, propranolol, and hydroxyzine                                               |
| Hypnotics                           | zolpidem, triazolam, doxepin, trazodone, and prazosin                                                                              |
| Antipsychotics                      | haloperidol, chlorpromazine, risperidone, quetiapine, olanzapine, lurasidone, aripiprazole                                         |
| Excluded medications                | melatonin, diphenhydramine, N-acetylcysteine, benztropine, trihexyphenidyl, cyproheptadine, or metformin                           |

**Table S2.** Number of Visits, Unique Med, and Med Class per year of the total clinic cohorts.

|                |           | Number of Visit | Number of Unique Meds | Number of Classes |
|----------------|-----------|-----------------|-----------------------|-------------------|
| 2019 (N = 851) | Mean (SD) | 2.99 (1.89)     | 2.58 (1.63)           | 2.00(1.13)        |
| Frequency      | 0         | NA              | 5.2 %                 | 5.2 %             |
|                | 1         | 25.7 %          | 23.3 %                | 32.9 %            |
|                | 2         | 21.3 %          | 26.2 %                | 32.0 %            |
|                | 3         | 20.9 %          | 19.2 %                | 19.3 %            |
|                | 4 or more | 32.1 %          | 26.2 %                | 10.7 %            |
| 2020 (N = 525) | Mean (SD) | 3.13 (2.04)     | 2.62 (1.40)           | 2.10 (1.02)       |
| Frequency      | 0         | NA              | 0 %                   | 0.2 %             |
|                | 1         | 21.7 %          | 24.4 %                | 32.0 %            |
|                | 2         | 23.2 %          | 28.6 %                | 37.3 %            |
|                | 3         | 23.0 %          | 20.8 %                | 20.8 %            |
|                | 4 or more | 32.0 %          | 26.3 %                | 9.7 %             |

NA: Not applicable.

**Table S3.** Number of Visits, Unique Med, and Med Class between not-paired vs paired sample in 2019.

|                      |           | Number of Visit | Number of Unique Meds | Number of Classes |
|----------------------|-----------|-----------------|-----------------------|-------------------|
| Not paired (N = 378) | Mean (SD) | 2.35 (1.66)     | 2.16 (1.54)           | 1.74 (1.15)       |
| Frequency            | 0         | NA              | 10.6 %                | 10.6 %            |
|                      | 1         | 39.9 %          | 30.4 %                | 38.9 %            |
|                      | 2         | 24.1 %          | 21.7 %                | 26.5 %            |
|                      | 3         | 18.0 %          | 18.5 %                | 15.1 %            |
|                      | 4 or more | 18.0 %          | 18.8 %                | 9.0 %             |
| Paired (N = 473)     | Mean (SD) | 3.50 (1.91)     | 2.92 (1.61)           | 2.20 (1.07)       |
| Frequency            | 0         | NA              | 0.8 %                 | 0.8 %             |
|                      | 1         | 14.4 %          | 17.5 %                | 28.1 %            |
|                      | 2         | 19.0 %          | 29.8 %                | 36.4 %            |

|  |           |        |        |        |
|--|-----------|--------|--------|--------|
|  | 3         | 23.3 % | 19.7 % | 22.6 % |
|  | 4 or more | 43.3 % | 32.1 % | 12.1 % |

NA: Not applicable.

**Table S4.** Number and percentage of patients receiving psychotropic polypharmacy (PP) organized by demographic factors.

| Year | Ages           | No of Patients | % Patients on PP | <i>p</i> Value |
|------|----------------|----------------|------------------|----------------|
| 2019 | 3 to 5 years   | 7              | 38.8             | 0.002          |
|      | 6 to 12 years  | 255            | 68.7             |                |
|      | 13 to 17 years | 244            | 73.4             |                |
|      | 18 to 21 years | 123            | 78.3             |                |
| 2020 | 3 to 5 years   | 2              | 33.3             | 0.067          |
|      | 6 to 12 years  | 153            | 78.5             |                |
|      | 13 to 17 years | 162            | 78.6             |                |
|      | 18 to 21 years | 80             | 73.4             |                |
| Year | Sex            | No of patients | % patients on PP | <i>p</i> value |
| 2019 | Female         | 124            | 73.8             | 0.471          |
|      | Male           | 485            | 71               |                |
| 2020 | Female         | 91             | 79.1             | 0.321          |
|      | Male           | 306            | 74.6             |                |
| Year | Ethnicity      | No of patients | % patients on PP | <i>p</i> value |
| 2019 | Non-Hispanic   | 506            | 72.5             | 0.338          |
|      | Hispanic       | 62             | 65.2             |                |
|      | Unknown        | 41             | 70.7             |                |
| 2020 | Non-Hispanic   | 341            | 76.3             | 0.466          |
|      | Hispanic       | 35             | 68.6             |                |
|      | Unknown        | 21             | 77.8             |                |
| Year | Race           | No of patients | % patients on PP | <i>p</i> value |
| 2019 | White          | 395            | 73.6             | 0.102          |
|      | Other          | 90             | 64.2             |                |
|      | Asian          | 46             | 66.6             |                |
|      | 2 or more      | 44             | 68.8             |                |
|      | Black          | 34             | 80.9             |                |
| 2020 | White          | 257            | 75.5             | 0.638          |
|      | Other          | 53             | 74.6             |                |
|      | Asian          | 34             | 69.4             |                |
|      | 2 or more      | 31             | 83.8             |                |
|      | Black          | 22             | 78.6             |                |
| Year | Insurance      | No of patients | % patients on PP | <i>p</i> value |
| 2019 | Commercial     | 404            | 74.1             | 0.083          |

|      |            |     |      |       |
|------|------------|-----|------|-------|
| 2020 | Medicaid   | 187 | 66.8 | 0.954 |
|      | Other      | 18  | 69.2 |       |
|      | Commercial | 255 | 75.2 |       |
|      | Medicaid   | 133 | 76.4 |       |
|      | Other      | 9   | 75   |       |

Percentage of patients calculated based on the the number of patients who exhibited PP within each demographic subclassification. For example, in 2019 74.1% of commercially insured patients and 80.9% of patients who identify as Black exhibited PP.

**Table S5.** Number and percentage of patients receiving multiclass psychotropic polypharmacy (MPP) organized by demographic factors.

| Year | Ages           | No of Patients | % Patients on MPP | <i>p</i> Value |
|------|----------------|----------------|-------------------|----------------|
| 2019 | 3 to 5 years   | 5              | 27.7              | <0.001         |
|      | 6 to 12 years  | 205            | 55.2              |                |
|      | 13 to 17 years | 200            | 65.6              |                |
|      | 18 to 21 years | 117            | 74.5              |                |
| 2020 | 3 to 5 years   | 2              | 33.3              | 0.046          |
|      | 6 to 12 years  | 128            | 62.7              |                |
|      | 13 to 17 years | 149            | 72.3              |                |
|      | 18 to 21 years | 77             | 70.6              |                |
| Year | Sex            | No of patients | % patients on MPP | <i>p</i> value |
| 2019 | Female         | 112            | 66.6              | 0.158          |
|      | Male           | 415            | 60.7              |                |
| 2020 | Female         | 81             | 70.4              | 0.495          |
|      | Male           | 275            | 67.1              |                |
|      | Ethnicity      | No of patients | % patients on MPP | <i>p</i> value |
| 2019 | Non-Hispanic   | 439            | 62.9              | 0.395          |
|      | Hispanic       | 53             | 55.8              |                |
|      | Unknown        | 35             | 60.3              |                |
| 2020 | Non-Hispanic   | 304            | 68.1              | 0.579          |
|      | Hispanic       | 32             | 62.7              |                |
|      | Unknown        | 20             | 74.1              |                |
| Year | Race           | No of patients | % patients on MPP | <i>p</i> value |
| 2019 | White          | 344            | 64.1              | 0.298          |
|      | Other          | 79             | 56.4              |                |
|      | Asian          | 38             | 55                |                |
|      | 2 or more      | 38             | 59.4              |                |
|      | Black          | 28             | 66.7              |                |
| 2020 | White          | 230            | 67.6              | 0.801          |
|      | Other          | 49             | 69                |                |
|      | Asian          | 30             | 61.2              |                |

|      | 2 or more  | 27             | 72.9              |         |
|------|------------|----------------|-------------------|---------|
|      | Black      | 20             | 71.4              |         |
| Year | Insurance  | No of patients | % patients on MPP | p value |
| 2019 | Commercial | 351            | 64.4              | 0.128   |
|      | Medicaid   | 162            | 57.9              |         |
|      | Other      | 14             | 53.8              |         |
| 2020 | Commercial | 232            | 68.4              | 0.406   |
|      | Medicaid   | 118            | 67.8              |         |
|      | Other      | 6              | 50                |         |

Percentage of patients calculated based on the the number of patients who exhibited MPP within each demographic subclassification. For example, in 2019 64.4% of commercially insured patients and 66.7% of patients who identify as Black exhibited MPP. .

**Table S6.** Medication classes prescribed in 2019 and 2020.

|                    | 2019               | 2020       |
|--------------------|--------------------|------------|
|                    | N <sup>1</sup> (%) | N (%)      |
| ADHD Medication    | 569 (33.5)         | 370 (33.5) |
| Antidepressants    | 484 (28.5)         | 330 (29.9) |
| Antipsychotics     | 273 (16.1)         | 168 (15.2) |
| Anxiolytics        | 184 (10.8)         | 117 (10.6) |
| Mood stabilizers   | 124 (7.3)          | 78 (7.1)   |
| Hypnotics          | 65 (3.8)           | 40 (3.6)   |
| Total <sup>2</sup> | 1699 (100)         | 1103 (100) |

<sup>1</sup> indicates the number of subjects who received at least one prescription classified into one of the 6 classes; <sup>2</sup> indicates total number of patients who received at least one prescription to each medication classes.

**Table S7.** Most prescribed unique medications in 2019 and 2020.

|                    | 2019               | 2020       |
|--------------------|--------------------|------------|
|                    | N <sup>1</sup> (%) | N (%)      |
| methylphenidate    | 235 (10.7)         | 140 (10.2) |
| guanfacine         | 230 (10.5)         | 157 (11.4) |
| sertraline         | 205 (9.3)          | 125 (9.1)  |
| clonidine          | 182 (8.3)          | 125 (9.1)  |
| fluoxetine         | 144 (6.6)          | 101 (7.3)  |
| risperidone        | 139 (6.3)          | 80 (5.8)   |
| aripiprazole       | 96 (4.4)           | 55 (4.0)   |
| hydroxyzine        | 95 (4.3)           | 69 (5.0)   |
| Total <sup>2</sup> | 2198               | 1378       |

<sup>1</sup> indicates the number of subjects who received at least one psychotropic prescription; <sup>2</sup> indicates total number of patients who received at least one prescription for psychiatric medication.
